# Supplementary material
Source: PubMed Central journal article supplement (PMC4711275)
Supplement: NIHMS698766-supplement-2.pdf [file NIHMS698766-supplement-2.pdf]

**Supplementary Table 1. Spatial and temporal firing patterns in the hippocampus of control and MEC-lesioned rats.**

| <b>Linear track</b>                                                                                                                                                                                                                                                                                                                                                                                                                                   |                  |                  |         |            |                        |          |          |
|-------------------------------------------------------------------------------------------------------------------------------------------------------------------------------------------------------------------------------------------------------------------------------------------------------------------------------------------------------------------------------------------------------------------------------------------------------|------------------|------------------|---------|------------|------------------------|----------|----------|
| <b>Entire session</b>                                                                                                                                                                                                                                                                                                                                                                                                                                 |                  |                  |         |            |                        |          |          |
|                                                                                                                                                                                                                                                                                                                                                                                                                                                       | Mean $\pm$ SEM   |                  | Median  |            | <i>P</i>               | <i>U</i> | <i>z</i> |
|                                                                                                                                                                                                                                                                                                                                                                                                                                                       | Control          | MEC lesion       | Control | MEC lesion |                        |          |          |
| Field size (cm) <sup>b</sup>                                                                                                                                                                                                                                                                                                                                                                                                                          | 42.30 $\pm$ 2.36 | 63.48 $\pm$ 2.10 | 40.79   | 65.84      | 1.18 $\times 10^{-6}$  | 3622     | 4.86     |
| Information (bits per spike) <sup>a</sup>                                                                                                                                                                                                                                                                                                                                                                                                             | 1.07 $\pm$ 0.08  | 0.52 $\pm$ 0.03  | 0.95    | 0.41       | 1.59 $\times 10^{-11}$ | 7531     | -6.74    |
| Rate by pass (Hz) <sup>a</sup>                                                                                                                                                                                                                                                                                                                                                                                                                        | 13.75 $\pm$ 0.83 | 10.30 $\pm$ 0.40 | 12.49   | 9.83       | 9.19 $\times 10^{-5}$  | 605      | -3.91    |
| Max firing rate (Hz) <sup>a</sup>                                                                                                                                                                                                                                                                                                                                                                                                                     | 12.26 $\pm$ 1.04 | 8.22 $\pm$ 0.44  | 10.15   | 6.81       | 2.91 $\times 10^{-4}$  | 6407     | -3.62    |
| Mean firing rate (Hz) <sup>a</sup>                                                                                                                                                                                                                                                                                                                                                                                                                    | 3.61 $\pm$ 0.31  | 3.48 $\pm$ 0.22  | 3.65    | 2.63       | 0.34                   | 5443     | -0.95    |
| Proportion bursts per cell <sup>a</sup>                                                                                                                                                                                                                                                                                                                                                                                                               | 0.13 $\pm$ 0.01  | 0.15 $\pm$ 0.01  | 0.14    | 0.14       | 0.19                   | 4626     | 1.31     |
| Control: <sup>a</sup> 50 cells (peak rate > 2 Hz), <sup>b</sup> 51 fields, 4 rats<br>MEC lesion: <sup>a</sup> 153 cells (peak rate > 2 Hz), <sup>b</sup> 164 fields, 6 rats                                                                                                                                                                                                                                                                           |                  |                  |         |            |                        |          |          |
| <b>PSSF</b>                                                                                                                                                                                                                                                                                                                                                                                                                                           |                  |                  |         |            |                        |          |          |
| Field size (cm) <sup>b</sup>                                                                                                                                                                                                                                                                                                                                                                                                                          | 44.71 $\pm$ 2.66 | 40.15 $\pm$ 2.06 | 45.80   | 37.05      | 0.13                   | 1843     | 1.53     |
| Information (bits per spike) <sup>a</sup>                                                                                                                                                                                                                                                                                                                                                                                                             | 1.02 $\pm$ 0.08  | 0.88 $\pm$ 0.04  | 0.96    | 0.84       | 0.20                   | 1618     | -1.31    |
| Rate by pass (Hz) <sup>a</sup>                                                                                                                                                                                                                                                                                                                                                                                                                        | 14.41 $\pm$ 0.94 | 16.58 $\pm$ 0.81 | 13.80   | 16.18      | 0.51                   | 611      | 0.65     |
| Max firing rate (Hz) <sup>a</sup>                                                                                                                                                                                                                                                                                                                                                                                                                     | 18.78 $\pm$ 1.25 | 20.47 $\pm$ 0.99 | 18.60   | 18.60      | 0.37                   | 1347     | 0.89     |
| Mean firing rate (Hz) <sup>a</sup>                                                                                                                                                                                                                                                                                                                                                                                                                    | 5.58 $\pm$ 0.38  | 5.97 $\pm$ 0.37  | 5.15    | 5.32       | 0.81                   | 1427     | 0.24     |
| Proportion bursts per cell <sup>a</sup>                                                                                                                                                                                                                                                                                                                                                                                                               | 0.13 $\pm$ 0.01  | 0.15 $\pm$ 0.01  | 0.13    | 0.14       | 0.55                   | 1384     | 0.59     |
| Theta ratio <sup>c</sup>                                                                                                                                                                                                                                                                                                                                                                                                                              | 20.08 $\pm$ 1.75 | 5.61 $\pm$ 0.44  | 18.47   | 5.07       | 5.70 $\times 10^{-10}$ | 1613     | -6.20    |
| Mean resultant vector length <sup>c</sup>                                                                                                                                                                                                                                                                                                                                                                                                             | 0.26 $\pm$ 0.04  | 0.20 $\pm$ 0.02  | 0.20    | 0.19       | 0.57                   | 1129     | -0.56    |
| Single cell theta frequency (Hz) <sup>d</sup>                                                                                                                                                                                                                                                                                                                                                                                                         | 8.40 $\pm$ 0.19  | 6.70 $\pm$ 0.27  | 8.54    | 6.84       | 3.90 $\times 10^{-6}$  | 301      | -4.62    |
| LFP theta frequency (Hz) <sup>e</sup>                                                                                                                                                                                                                                                                                                                                                                                                                 | 7.43 $\pm$ 0.14  | 6.92 $\pm$ 0.06  | 7.45    | 6.84       | 0.0052                 | 71       | N.A.     |
| LFP theta power in CA1 ( $\mu\text{V}^2\text{Hz}^{-1}$ ) <sup>f</sup>                                                                                                                                                                                                                                                                                                                                                                                 | 10.54 $\pm$ 2.10 | 6.02 $\pm$ 1.69  | 9.50    | 3.50       | 0.015                  | 634      | -2.45    |
| Control: <sup>a</sup> 31 cells (peak rate > 2 Hz), <sup>b</sup> 31 fields, <sup>c</sup> 30 cells (as in Fig. 2), <sup>d</sup> 29 cells (theta ratio > 5),<br><sup>e</sup> 6 sessions, <sup>f</sup> 20 tetrodes in 4 rats; MEC lesion: <sup>a</sup> 62 cells (peak rate > 2 Hz), <sup>b</sup> 73 fields, <sup>c</sup> 41 cells (as in Fig. 2),<br><sup>d</sup> 21 cells (theta ratio > 5), <sup>e</sup> 9 sessions, <sup>f</sup> 30 tetrodes in 5 rats |                  |                  |         |            |                        |          |          |

| Open field                                                                    |                  |                  |         |            |                         |          |          |
|-------------------------------------------------------------------------------|------------------|------------------|---------|------------|-------------------------|----------|----------|
|                                                                               | Mean $\pm$ SEM   |                  | Median  |            | <i>P</i>                | <i>U</i> | <i>z</i> |
|                                                                               | Control          | MEC lesion       | Control | MEC lesion |                         |          |          |
| Theta ratio <sup>a</sup>                                                      | 27.39 $\pm$ 1.60 | 12.16 $\pm$ 1.49 | 26.24   | 9.68       | 4.40 x 10 <sup>-8</sup> | 405      | -5.47    |
| Mean resultant vector length <sup>a</sup>                                     | 0.14 $\pm$ 0.02  | 0.14 $\pm$ 0.02  | 0.11    | 0.11       | 0.52                    | 892      | 0.65     |
| Theta frequency single cell (Hz) <sup>b</sup>                                 | 8.19 $\pm$ 0.09  | 6.62 $\pm$ 0.28  | 8.06    | 7.08       | 3.36 x 10 <sup>-7</sup> | 402      | -5.10    |
| Frequency difference (Hz) <sup>b</sup>                                        | 0.48             | -0.57            | 0.60    | -0.12      | 0.0015                  | -3.17    | 549      |
| Cell-LFP LFP theta frequency (Hz) <sup>c</sup>                                | 7.68 $\pm$ 0.11  | 7.14 $\pm$ 0.14  | 7.70    | 7.20       | 0.0096                  | 99.5     | N/A      |
| LFP theta power in CA1 ( $\mu$ V <sup>2</sup> Hz <sup>-1</sup> ) <sup>d</sup> | 3.73 $\pm$ 1.07  | 4.44 $\pm$ 1.00  | 2.30    | 2.46       | 0.76                    | 431      | 0.31     |

Control: <sup>a</sup>45 cells (fields < 0.25 m<sup>2</sup>), <sup>b</sup>45 cells (theta ratio > 5), <sup>c</sup>7 sessions, <sup>d</sup>16 tetrodes, 3 rats  
MEC lesion: <sup>a</sup>24 cells (fields < 0.25 m<sup>2</sup>), <sup>b</sup>23 cells (theta ratio > 5), <sup>c</sup>12 sessions, <sup>d</sup>39 tetrodes, 4 rats

Supplementary Table 2. Comparisons of slopes from fields of control and MEC-lesioned rats.

| Linear track – pooled-pass analysis |                            |                                       |                                 |                                         |                        |                                |
|-------------------------------------|----------------------------|---------------------------------------|---------------------------------|-----------------------------------------|------------------------|--------------------------------|
| Control                             |                            |                                       |                                 |                                         |                        |                                |
|                                     | Unrestricted<br>all slopes | Unrestricted<br>significant<br>slopes | Fields < 60<br>cm<br>all slopes | Fields < 60 cm<br>significant<br>slopes | PSSFs<br>all slopes    | PSSFs<br>significant<br>slopes |
|                                     | 46 fields<br>in 4 rats     | 35 fields<br>in 4 rats                | 38 fields<br>in 4 rats          | 29 fields<br>in 4 rats                  | 31 fields<br>in 4 rats | 25 fields<br>in 4 rats         |
| <b>Normal</b>                       | Yes                        | Yes                                   | Yes                             | Yes                                     | Yes                    | Yes                            |
| <b>Mean<br/>± SEM</b>               | -0.38<br>± 0.06            | -0.39<br>± 0.07                       | -0.36<br>± 0.07                 | -0.37<br>± 0.09                         | -0.38<br>± 0.08        | -0.37<br>± 0.08                |
| <b>t test</b>                       |                            |                                       |                                 |                                         |                        |                                |
| <b>P</b>                            | $1.34 \times 10^{-7}$      | $7.84 \times 10^{-6}$                 | $9.50 \times 10^{-6}$           | $2.17 \times 10^{-4}$                   | $3.33 \times 10^{-5}$  | $6.19 \times 10^{-5}$          |
| <b>df</b>                           | 45                         | 34                                    | 37                              | 28                                      | 30                     | 24                             |
| <b>t</b>                            | -6.25                      | -5.26                                 | -5.13                           | -4.24                                   | -4.87                  | -4.84                          |
| MEC lesion                          |                            |                                       |                                 |                                         |                        |                                |
|                                     | 128 fields<br>in 6 rats    | 56 fields<br>in 6 rats                | 40 fields<br>in 6 rats          | 13 fields<br>in 5 rats                  | 50 fields<br>in 5 rats | 18 fields<br>in 4 rats         |
| <b>Normal</b>                       | Yes                        | Yes                                   | Yes                             | Yes                                     | Yes                    | Yes                            |
| <b>Mean<br/>± SEM</b>               | -0.09<br>± 0.07            | -0.23<br>± 0.10                       | 0.02<br>± 0.13                  | -0.28<br>± 0.22                         | -0.04<br>± 0.10        | -0.30<br>± 0.13                |
| <b>t test</b>                       |                            |                                       |                                 |                                         |                        |                                |
| <b>P</b>                            | 0.17                       | 0.03                                  | 0.91                            | 0.23                                    | 0.73                   | 0.039                          |
| <b>df</b>                           | 127                        | 55                                    | 39                              | 12                                      | 49                     | 17                             |
| <b>t</b>                            | -1.38                      | -2.30                                 | 0.12                            | -1.26                                   | -0.35                  | -2.23                          |

| Linear track – single-pass analysis |                            |                                       |                                 |                                         |                         |                                |
|-------------------------------------|----------------------------|---------------------------------------|---------------------------------|-----------------------------------------|-------------------------|--------------------------------|
| Control                             |                            |                                       |                                 |                                         |                         |                                |
|                                     | Unrestricted<br>all slopes | Unrestricted<br>significant<br>slopes | Fields < 60<br>cm<br>all slopes | Fields < 60 cm<br>significant<br>slopes | PSSFs<br>all slopes     | PSSFs<br>significant<br>slopes |
|                                     | 47 fields<br>in 4 rats     | 39 fields<br>in 4 rats                | 38 fields<br>in 4 rats          | 30 fields<br>in 4 rats                  | 31 fields<br>in 4 rats  | 25 fields<br>in 4 rats         |
| <b>Normal</b>                       | Yes                        | Yes                                   | Yes                             | Yes                                     | Yes                     | Yes                            |
| <b>Mean<br/>± SEM</b>               | -0.34<br>± 0.04            | -0.51<br>± 0.07                       | -0.33<br>± 0.05                 | -0.44<br>± 0.06                         | -0.33<br>± 0.07         | -0.37<br>± 0.08                |
| <b>t test</b>                       |                            |                                       |                                 |                                         |                         |                                |
| <b>P</b>                            | 6.21 x 10 <sup>-11</sup>   | 1.82 x 10 <sup>-9</sup>               | 1.60 x 10 <sup>-8</sup>         | 2.50 x 10 <sup>-8</sup>                 | 2.61 x 10 <sup>-5</sup> | 1.51 x 10 <sup>-4</sup>        |
| <b>df</b>                           | 46                         | 38                                    | 37                              | 29                                      | 30                      | 24                             |
| <b>t</b>                            | -8.46                      | -7.85                                 | -7.19                           | -7.56                                   | -4.96                   | -4.49                          |
| MEC lesion                          |                            |                                       |                                 |                                         |                         |                                |
|                                     | 133 fields<br>in 6 rats    | 89 fields<br>in 6 rats                | 41 fields<br>in 6 rats          | 21 fields<br>in 5 rats                  | 50 fields<br>in 5 rats  | 27 fields<br>in 4 rats         |
| <b>Normal</b>                       | Yes                        | Yes                                   | Yes                             | Yes                                     | Yes                     | Yes                            |
| <b>Mean<br/>± SEM</b>               | -0.17<br>± 0.04            | -0.21<br>± 0.10                       | -0.14<br>± 0.10                 | -0.17<br>± 0.22                         | 0.01<br>± 0.22          | -0.11<br>± 0.18                |
| <b>t test</b>                       |                            |                                       |                                 |                                         |                         |                                |
| <b>P</b>                            | 2.05 x 10 <sup>-4</sup>    | 0.035                                 | 0.17                            | 0.44                                    | 0.90                    | 0.53                           |
| <b>df</b>                           | 132                        | 88                                    | 40                              | 20                                      | 49                      | 26                             |
| <b>t</b>                            | -3.82                      | -2.14                                 | -1.40                           | 0.79                                    | 0.13                    | -0.64                          |

| Open field – pooled-pass analysis |                            |                                       |                                               |                                                       |
|-----------------------------------|----------------------------|---------------------------------------|-----------------------------------------------|-------------------------------------------------------|
| Control                           |                            |                                       |                                               |                                                       |
|                                   | Unrestricted<br>all slopes | Unrestricted<br>significant<br>slopes | Fields<br>< 0.25 m <sup>2</sup><br>all slopes | Fields < 0.25 m <sup>2</sup><br>significant<br>slopes |
|                                   | 50 fields<br>in 3 rats     | 38 fields<br>in 3 rats                | 46 fields<br>in 3 rats                        | 35 fields<br>in 3 rats                                |
| <b>Normal</b>                     | Yes                        | Yes                                   | Yes                                           | Yes                                                   |
| <b>Mean<br/>± SEM</b>             | -0.40<br>± 0.06            | -0.47<br>± 0.05                       | -0.48<br>± 0.05                               | -0.53 ±<br>0.04                                       |
| <b>t test</b>                     |                            |                                       |                                               |                                                       |
| <b>P</b>                          | 6.56 x 10 <sup>-8</sup>    | 8.37 x 10 <sup>-11</sup>              | 6.64 x 10 <sup>-12</sup>                      | 1.41 x 10 <sup>-16</sup>                              |
| <b>df</b>                         | 50                         | 37                                    | 45                                            | 34                                                    |
| <b>t</b>                          | -6.33                      | -8.96                                 | -9.20                                         | -15.02                                                |
| MEC lesion                        |                            |                                       |                                               |                                                       |
|                                   | 48 fields<br>in 6 rats     | 13 fields<br>in 5 rats                | 21 fields<br>in 4 rats                        | 8 fields<br>in 3 rats                                 |
| <b>Normal</b>                     | Yes                        | Yes                                   | Yes                                           | Yes                                                   |
| <b>Mean ±<br/>SEM</b>             | 0.12<br>± 0.13             | -0.06<br>± 0.20                       | 0.10<br>± 0.20                                | -0.15<br>± 0.17                                       |
| <b>t test</b>                     |                            |                                       |                                               |                                                       |
| <b>P</b>                          | 0.36                       | 0.78                                  | 0.61                                          | 0.39                                                  |
| <b>df</b>                         | 44                         | 17                                    | 20                                            | 7                                                     |
| <b>t</b>                          | 0.92                       | -0.29                                 | 0.52                                          | -0.92                                                 |

---



---

**Open field – single-pass analysis**

---

**Control**

---

|                       | Unrestricted<br>all slopes | Unrestricted<br>significant<br>slopes | Fields<br>< 0.25 m <sup>2</sup><br>all slopes | Fields < 0.25 m <sup>2</sup><br>significant<br>slopes |
|-----------------------|----------------------------|---------------------------------------|-----------------------------------------------|-------------------------------------------------------|
|                       | 51 fields<br>in 3 rats     | 49 fields<br>in 3 rats                | 47 fields<br>in 3 rats                        | 45 fields<br>in 3 rats                                |
| <b>Normal</b>         | Yes                        | Yes                                   | Yes                                           | Yes                                                   |
| <b>Mean<br/>± SEM</b> | -0.39<br>± 0.04            | -0.50<br>± 0.08                       | -0.39<br>± 0.04                               | -0.52<br>± 0.08                                       |
| <b>t test</b>         |                            |                                       |                                               |                                                       |
| <b>P</b>              | 1.66 x 10 <sup>-13</sup>   | 3.41 x 10 <sup>-8</sup>               | 1.44 x 10 <sup>-12</sup>                      | 2.81 x 10 <sup>-8</sup>                               |
| <b>df</b>             | 50                         | 49                                    | 46                                            | 44                                                    |
| <b>t</b>              | -9.98                      | -6.54                                 | -9.60                                         | -6.73                                                 |

---

**MEC lesion**

---

|                       |                        |                        |                        |                        |
|-----------------------|------------------------|------------------------|------------------------|------------------------|
|                       | 54 fields<br>in 6 rats | 35 fields<br>in 6 rats | 25 fields<br>in 4 rats | 14 fields<br>in 4 rats |
| <b>Normal</b>         | Yes                    | Yes                    | Yes                    | Yes                    |
| <b>Mean<br/>± SEM</b> | 0.02<br>± 0.08         | 0.00<br>± 0.14         | 0.02<br>± 0.16         | -0.02<br>± 0.14        |
| <b>t test</b>         |                        |                        |                        |                        |
| <b>P</b>              | 0.79                   | 0.98                   | 0.91                   | 0.89                   |
| <b>df</b>             | 50                     | 40                     | 24                     | 14                     |
| <b>t</b>              | 0.26                   | -0.02                  | 0.11                   | -0.14                  |

---

**Supplementary Table 3. Comparisons of slopes from fields recorded before and during septal inactivation.**

| <b>Open field</b>            |                                |                                                               |                                                            |                                            |                                                               |                                                            |  |
|------------------------------|--------------------------------|---------------------------------------------------------------|------------------------------------------------------------|--------------------------------------------|---------------------------------------------------------------|------------------------------------------------------------|--|
| <b>Single-pass analysis</b>  |                                |                                                               |                                                            |                                            |                                                               |                                                            |  |
|                              | <b>Baseline<br/>all slopes</b> | <b>30 min into<br/>septal<br/>inactivation<br/>all slopes</b> | <b>2 h into<br/>septal<br/>inactivation<br/>all slopes</b> | <b>Baseline<br/>significant<br/>slopes</b> | <b>30 min into<br/>septal<br/>inactivation<br/>all slopes</b> | <b>2 h into<br/>septal<br/>inactivation<br/>all slopes</b> |  |
|                              | 52 fields<br>in 4 rats         | 46 fields<br>in 4 rats                                        | 44 fields<br>in 4 rats                                     | 45 fields<br>in 4 rats                     | 30 fields<br>in 4 rats                                        | 32 fields<br>in 4 rats                                     |  |
| <b>Normal</b>                | Yes                            | Yes                                                           | Yes                                                        | No                                         | Yes                                                           | Yes                                                        |  |
| <b>Mean</b>                  | -0.32                          | -0.04                                                         | -0.30                                                      | -0.48                                      | 0.04                                                          | -0.41                                                      |  |
| <b>± SEM</b>                 | ± 0.06                         | ± 0.07                                                        | ± 0.06                                                     | ± 0.09                                     | ± 0.13                                                        | ± 0.12                                                     |  |
| <b>Median</b>                | -0.37                          | -0.042                                                        | -0.28                                                      | -0.62                                      | -0.11                                                         | -0.61                                                      |  |
| <b>t test</b>                |                                |                                                               |                                                            |                                            |                                                               |                                                            |  |
| <b>P</b>                     | 1.01 x 10 <sup>-5</sup>        | 0.54                                                          | 2.09 x 10 <sup>-5</sup>                                    | 9.33 x 10 <sup>-9</sup>                    | 0.86                                                          | 0.020                                                      |  |
| <b>df</b>                    | 51                             | 45                                                            | 43                                                         | 4                                          | 14                                                            | 9                                                          |  |
| <b>t</b>                     | -4.90                          | -0.62                                                         | -4.78                                                      | N/A                                        | N/A                                                           | N/A                                                        |  |
| <b>Sign test<sup>1</sup></b> |                                |                                                               |                                                            |                                            |                                                               |                                                            |  |
| <b>P</b>                     |                                |                                                               |                                                            |                                            |                                                               |                                                            |  |
| <b>Sign</b>                  |                                |                                                               |                                                            |                                            |                                                               |                                                            |  |
| <b>z</b>                     |                                |                                                               |                                                            |                                            |                                                               |                                                            |  |
| <b>Pooled-pass analysis</b>  |                                |                                                               |                                                            |                                            |                                                               |                                                            |  |
|                              | 51 fields<br>in 4 rats         | 44 fields<br>in 4 rats                                        | 42 fields<br>in 4 rats                                     | 39 fields<br>in 4 rats                     | 20 fields<br>in 4 rats                                        | 23 fields<br>in 4 rats                                     |  |
| <b>Normal</b>                | No                             | Yes                                                           | Yes                                                        | No                                         | Yes                                                           | Yes                                                        |  |
| <b>Mean</b>                  | -0.40                          | -0.31                                                         | -0.42                                                      | -0.39                                      | -0.30                                                         | -0.51                                                      |  |
| <b>± SEM</b>                 | ± 0.064                        | ± 0.12                                                        | ± 0.08                                                     | ± 0.07                                     | ± 0.11                                                        | ± 0.09                                                     |  |
| <b>Median</b>                | -0.40                          | -0.31                                                         | -0.38                                                      | -0.42                                      | -0.37                                                         | -0.45                                                      |  |
| <b>t test</b>                |                                |                                                               |                                                            |                                            |                                                               |                                                            |  |
| <b>P</b>                     | 1.97 x 10 <sup>-11</sup>       | 3.88 x 10 <sup>-4</sup>                                       | 5.63 x 10 <sup>-9</sup>                                    | 2.84 x 10 <sup>-9</sup>                    | 4.02 x 10 <sup>-4</sup>                                       | 5.72 x 10 <sup>-6</sup>                                    |  |
| <b>df</b>                    | 3                              | 10                                                            | 3                                                          | 2                                          | 2                                                             | 1                                                          |  |
| <b>t</b>                     | N/A                            | N/A                                                           | N/A                                                        | N/A                                        | N/A                                                           | N/A                                                        |  |
| <b>Sign test<sup>1</sup></b> |                                |                                                               |                                                            |                                            |                                                               |                                                            |  |
| <b>P</b>                     |                                |                                                               |                                                            |                                            |                                                               |                                                            |  |
| <b>Sign</b>                  |                                |                                                               |                                                            |                                            |                                                               |                                                            |  |
| <b>z</b>                     |                                |                                                               |                                                            |                                            |                                                               |                                                            |  |

<sup>1</sup>When one of the distributions was not normal, the nonparametric test was used for all corresponding comparisons.

**Supplementary Table 4. Comparison of temporal firing patterns and phase precession slopes between MEC-lesioned rats and rats with septal inactivation.**

| <b>LFP - Theta frequency (Hz)</b>         |                         |                      |                                                |                                             |
|-------------------------------------------|-------------------------|----------------------|------------------------------------------------|---------------------------------------------|
|                                           | MEC lesion              | Baseline             | 30 min into septal inactivation                | 2 h into septal inactivation                |
|                                           | 12 tetrodes in 4 rats   | 5 tetrodes in 4 rats | 5 tetrodes in 4 rats                           | 5 tetrodes in 4 rats                        |
| Normal                                    | No                      | No                   | No                                             | No                                          |
| Median                                    | 7.20                    | 7.70                 | 7.08                                           | 7.08                                        |
| Mean                                      | 7.14                    | 7.52                 | 7.13                                           | 7.08                                        |
| SEM                                       | 0.14                    | 0.14                 | 0.33                                           | 0.32                                        |
|                                           | Baseline vs. MEC lesion |                      | MEC lesion vs. 30 min into septal inactivation | MEC lesion vs. 2 h into septal inactivation |
| <i>P</i>                                  | 0.29                    |                      | 1.00                                           | 1.00                                        |
| <i>U</i>                                  | N/A                     |                      | N/A                                            | N/A                                         |
| <i>z</i>                                  | N/A                     |                      | N/A                                            | N/A                                         |
| <b>Single cell - Theta ratio</b>          |                         |                      |                                                |                                             |
|                                           | MEC lesion              | Baseline             | 30 min into septal inactivation                | 2 h into septal inactivation                |
|                                           | 24 cells in 4 rats      | 35 cells in 4 rats   | 39 cells in 4 rats                             | 41 cells in 4 rats                          |
| Normal                                    | no                      | no                   | no                                             | no                                          |
| Median                                    | 9.68                    | 23.70                | 8.29                                           | 8.18                                        |
| Mean                                      | 12.16                   | 28.87                | 8.69                                           | 10.44                                       |
| SEM                                       | 1.49                    | 2.44                 | 0.78                                           | 1.15                                        |
|                                           | Baseline vs. MEC lesion |                      | MEC lesion vs. 30 min into septal inactivation | MEC lesion vs. 2 h into septal inactivation |
| <i>P</i>                                  | 1.89 x 10 <sup>-6</sup> |                      | 0.14                                           | 0.26                                        |
| <i>U</i>                                  | 425                     |                      | 897                                            | 793                                         |
| <i>z</i>                                  | -4.98                   |                      | 1.82                                           | 1.12                                        |
| <b>Single cell - theta frequency (Hz)</b> |                         |                      |                                                |                                             |
|                                           | MEC lesion              | Baseline             | 30 min into septal inactivation                | 2 h into septal inactivation                |
|                                           | 23 cells in 4 rats      | 40 cells in 4 rats   | 31 cells in 4 rats                             | 30 cells in 4 rats                          |
| Normal                                    | no                      | no                   | no                                             | no                                          |
| Median                                    | 7.08                    | 8.30                 | 7.81                                           | 7.57                                        |
| Mean                                      | 6.60                    | 8.29                 | 8.06                                           | 7.62                                        |
| SEM                                       | 0.31                    | 0.10                 | 0.21                                           | 0.14                                        |
|                                           | Baseline vs. MEC lesion |                      | MEC lesion vs. 30 min into septal inactivation | MEC lesion vs. 2 h into septal inactivation |
| <i>P</i>                                  | 1.68 x 10 <sup>-7</sup> |                      | 0.0010                                         | 0.027                                       |
| <i>U</i>                                  | 376                     |                      | 435                                            | 498                                         |
| <i>z</i>                                  | -5.18                   |                      | -3.47                                          | -2.21                                       |



| <b>Frequency difference (Cell – LFP, Hz)</b> |                         |                     |                                                |                                             |
|----------------------------------------------|-------------------------|---------------------|------------------------------------------------|---------------------------------------------|
|                                              | MEC lesion              | Baseline            | 30 min into septal inactivation                | 2 h into septal inactivation                |
|                                              | 23 cells in 4 rats      | 40 cells in 4 rats  | 31 cells in 4 rats                             | 30 cells in 4 rats                          |
| Normal                                       | no                      | no                  | no                                             | no                                          |
| Median                                       | -0.12                   | 0.60                | 0.49                                           | 0.24                                        |
| Mean                                         | -0.57                   | 0.66                | 0.73                                           | 0.34                                        |
| SEM                                          | 0.30                    | 0.09                | 0.20                                           | 0.11                                        |
|                                              | Baseline vs. MEC lesion |                     | MEC lesion vs. 30 min into septal inactivation | MEC lesion vs. 2 h into septal inactivation |
| <i>P</i>                                     | 0.00023                 |                     | 0.0038                                         | 0.026                                       |
| <i>U</i>                                     | 460                     |                     | 455                                            | 497                                         |
| <i>z</i>                                     | -3.95                   |                     | -3.10                                          | -2.22                                       |
| <b>Single-pass analysis (all passes)</b>     |                         |                     |                                                |                                             |
|                                              | MEC lesion              | Baseline            | 30 min into septal inactivation                | 2 h into septal inactivation                |
|                                              | 25 fields in 4 rats     | 52 fields in 4 rats | 46 fields in 4 rats                            | 44 fields in 4 rats                         |
| Normal                                       | yes                     | no                  | yes                                            | yes                                         |
| Median                                       | -0.07                   | -0.37               | -0.04                                          | -0.28                                       |
| Mean                                         | 0.02                    | -0.32               | -0.04                                          | -0.30                                       |
| SEM                                          | 0.16                    | 0.06                | 0.07                                           | 0.06                                        |
|                                              | Baseline vs. MEC lesion |                     | MEC lesion vs. 30 min into septal inactivation | MEC lesion vs. 2 h into septal inactivation |
| <i>P</i>                                     | 0.028                   |                     | 0.97                                           | 0.13                                        |
| <i>U</i>                                     | 1215                    |                     | 904                                            | 1023                                        |
| <i>z</i>                                     | 2.61                    |                     | 0.042                                          | 1.84                                        |
| <b>Pooled-pass analysis (all passes)</b>     |                         |                     |                                                |                                             |
|                                              | MEC lesion              | Baseline            | 30 min into septal inactivation                | 2 h into septal inactivation                |
|                                              | 21 fields in 4 rats     | 51 fields in 4 rats | 44 fields in 4 rats                            | 42 fields in 4 rats                         |
| Normal                                       | yes                     | no                  | yes                                            | yes                                         |
| Median                                       | 0.08                    | -0.40               | -0.37                                          | -0.38                                       |
| Mean                                         | 0.10                    | -0.40               | -0.31                                          | -0.42                                       |
| SEM                                          | 0.20                    | 0.064               | 0.12                                           | 0.08                                        |
|                                              | Baseline vs. MEC lesion |                     | MEC lesion vs. 30 min into septal inactivation | MEC lesion vs. 2 h into septal inactivation |
| <i>P</i>                                     | 0.036                   |                     | 0.081                                          | 0.037                                       |
| <i>U</i>                                     | 970                     |                     | 818                                            | 834                                         |
| <i>z</i>                                     | 2.51                    |                     | 1.75                                           | 2.35                                        |

<sup>1</sup>When one of the distributions was not normal, the nonparametric test was used for all corresponding comparisons.
